# Supplementary material for: The Molecular Effects of a High Fat Diet on Endometrial Tumour Biology
Source: MDPI journal article supplement (doi:10.3390/life10090188), 2020-09-10
Supplement: s1 [file life-906543-supplementary.xlsx]

## Sheet: Supplementary Table S1
	Study Group (N=19)
	NCD Group (N=7)	HFD Group (N=12)	p-value (<0.05)
Mean weight at start of study	185.7g (SD 8.0)	177.2g (SD 18.7)	0.41
Average age at cull	451.1 days (range 446-459)	442.8 days (range 429-454)	N/A
Mean weight at cull	210.8g (SD 6.4)	227g (SD 12.4)	0.01
Mean weight gain during study	25.1 (SD 7.5)	50.0 (SD 27.3)	0.01
Incidence of endometrial cancer	57.1 % (4/7)	33.3% (4/12)	0.37
Abbreviations: NCD – Normal chow diet, HFD –High fat diet, SD – Standard deviation.

## Sheet: Supplementary Table S2
Cox regression analysis of Overall Survival for Brd.
		Univariate				Multivariate
	HR	95.0% CI		P value	HR	95.0% CI		P value
Overall Survival		Lower	Upper			Lower	Upper
BRD4 (low v's high)	2.034	1.009	4.102	0.047	1.75	0.839	3.651	0.136
Age (continuous)	1.041	1.009	1.075	0.013	1.032	0.994	1.071	0.101
Histology (Endometrioid v's non-endometrioid)	2.298	1.18	4.475	0.014	0.732	0.306	1.752	0.484
Stage (1&2v3&4)	4.654	2.448	8.849	<0.001	3.807	1.824	7.946	<0.001
Grade (1&2v3)	3.393	1.652	6.969	0.001	2.431	0.984	6.004	0.054
Abbreviations: Brd4 -- Bromodomain 4, CI – confidence interval, HR – hazard ratio.

## Sheet: Supplementary Table S3
Rat variants within the Tp53 gene region
#CHROM	10	10	10	10	10	10	10	10	10	10	10	10	10	10	10	10
POS	56195428	56195436	56195442	56195562	56195619	56195716	56195724	56195725	56195727	56195728	56196090	56196095	56196132	56196150	56196156	56196328
ID	.	.	.	.	.	.	.	.	.	.	.	.	.	.	.	.
REF	G	C	G	C	C	G	C	G	C	G	G	G	G	A	AT	G
ALT	A	G	A	T	T	C	T	A	T	A	A	T	C	G	A	GA
cDNA	ENSRNOT00000046490.3:c.518G>A	ENSRNOT00000046490.3:c.526C>G	ENSRNOT00000046490.3:c.532G>A	ENSRNOT00000046490.3:c.574C>T	ENSRNOT00000046490.3:c.631C>T	ENSRNOT00000046490.3:c.728G>C	ENSRNOT00000046490.3:c.736C>T	ENSRNOT00000046490.3:c.737G>A	ENSRNOT00000046490.3:c.739C>T	ENSRNOT00000046490.3:c.740G>A	ENSRNOT00000046490.3:c.791G>A	ENSRNOT00000046490.3:c.796G>T	ENSRNOT00000046490.3:c.833G>C	ENSRNOT00000046490.3:c.851A>G	ENSRNOT00000046490.3:c.860del	ENSRNOT00000046490.3:c.957dup
protein	ENSRNOP00000047840.2:p.Arg173His	ENSRNOP00000047840.2:p.His176Asp	ENSRNOP00000047840.2:p.Glu178Lys	ENSRNOP00000047840.2:p.Leu192Phe	ENSRNOP00000047840.2:p.Arg211Trp	ENSRNOP00000047840.2:p.Gly243Ala	ENSRNOP00000047840.2:p.Arg246Cys	ENSRNOP00000047840.2:p.Arg246His	ENSRNOP00000047840.2:p.Arg247Trp	ENSRNOP00000047840.2:p.Arg247Gln	ENSRNOP00000047840.2:p.Gly264Glu	ENSRNOP00000047840.2:p.Asp266Tyr	ENSRNOP00000047840.2:p.Arg278Thr	ENSRNOP00000047840.2:p.Glu284Gly	ENSRNOP00000047840.2:p.Phe287SerfsTer56	ENSRNOP00000047840.2:p.Pro320ThrfsTer10	Individual	Tissue	Diet	Restricted	Drug
S1	./.:.:.:.:.	./.:.:.:.:.	./.:.:.:.:.	./.:.:.:.:.	./.:.:.:.:.	./.:.:.:.:.	./.:.:.:.:.	0/1:86,35:121:99:892,0,2733	./.:.:.:.:.	./.:.:.:.:.	./.:.:.:.:.	./.:.:.:.:.	./.:.:.:.:.	./.:.:.:.:.	./.:.:.:.:.	0/1:105,13:118:49:49,0,2874	1	Normal_Tumour	NC	NO	NO
S2	./.:.:.:.:.	./.:.:.:.:.	./.:.:.:.:.	./.:.:.:.:.	./.:.:.:.:.	./.:.:.:.:.	./.:.:.:.:.	./.:.:.:.:.	./.:.:.:.:.	./.:.:.:.:.	./.:.:.:.:.	./.:.:.:.:.	./.:.:.:.:.	./.:.:.:.:.	./.:.:.:.:.	./.:.:.:.:.	1	Tumour	NC	NO	NO
S3	./.:.:.:.:.	0/1:30,81:111:99:2292,0,695	./.:.:.:.:.	./.:.:.:.:.	./.:.:.:.:.	./.:.:.:.:.	./.:.:.:.:.	./.:.:.:.:.	./.:.:.:.:.	./.:.:.:.:.	./.:.:.:.:.	./.:.:.:.:.	./.:.:.:.:.	./.:.:.:.:.	./.:.:.:.:.	0/1:101,13:114:41:41,0,2784	1	Tumour	NC	NO	NO
S4	./.:.:.:.:.	0/1:71,10:81:76:76,0,2134	./.:.:.:.:.	./.:.:.:.:.	./.:.:.:.:.	./.:.:.:.:.	./.:.:.:.:.	./.:.:.:.:.	./.:.:.:.:.	./.:.:.:.:.	./.:.:.:.:.	./.:.:.:.:.	./.:.:.:.:.	./.:.:.:.:.	./.:.:.:.:.	./.:.:.:.:.	1	Tumour	NC	NO	NO
S36	0/1:79,154:233:99:4149,0,1984	./.:.:.:.:.	./.:.:.:.:.	./.:.:.:.:.	./.:.:.:.:.	./.:.:.:.:.	./.:.:.:.:.	./.:.:.:.:.	./.:.:.:.:.	./.:.:.:.:.	./.:.:.:.:.	./.:.:.:.:.	./.:.:.:.:.	./.:.:.:.:.	./.:.:.:.:.	./.:.:.:.:.	2	Tumour	HFD	RES	NO
S37	./.:.:.:.:.	./.:.:.:.:.	./.:.:.:.:.	./.:.:.:.:.	./.:.:.:.:.	./.:.:.:.:.	./.:.:.:.:.	./.:.:.:.:.	./.:.:.:.:.	./.:.:.:.:.	./.:.:.:.:.	./.:.:.:.:.	./.:.:.:.:.	./.:.:.:.:.	./.:.:.:.:.	./.:.:.:.:.	2	Normal	HFD	RES	NO
S5	./.:.:.:.:.	./.:.:.:.:.	./.:.:.:.:.	./.:.:.:.:.	./.:.:.:.:.	./.:.:.:.:.	./.:.:.:.:.	./.:.:.:.:.	./.:.:.:.:.	./.:.:.:.:.	./.:.:.:.:.	./.:.:.:.:.	./.:.:.:.:.	./.:.:.:.:.	./.:.:.:.:.	0/1:101,20:121:99:257,0,2769	2	Normal	NC	NO	NO
S38	./.:.:.:.:.	./.:.:.:.:.	./.:.:.:.:.	./.:.:.:.:.	./.:.:.:.:.	./.:.:.:.:.	./.:.:.:.:.	./.:.:.:.:.	./.:.:.:.:.	./.:.:.:.:.	./.:.:.:.:.	./.:.:.:.:.	./.:.:.:.:.	./.:.:.:.:.	./.:.:.:.:.	./.:.:.:.:.	3	Normal	HFD	RES	NO
S6	./.:.:.:.:.	./.:.:.:.:.	./.:.:.:.:.	./.:.:.:.:.	./.:.:.:.:.	./.:.:.:.:.	./.:.:.:.:.	./.:.:.:.:.	./.:.:.:.:.	./.:.:.:.:.	./.:.:.:.:.	./.:.:.:.:.	./.:.:.:.:.	./.:.:.:.:.	./.:.:.:.:.	./.:.:.:.:.	3	Normal	NC	NO	NO
S39	./.:.:.:.:.	./.:.:.:.:.	./.:.:.:.:.	./.:.:.:.:.	./.:.:.:.:.	./.:.:.:.:.	./.:.:.:.:.	./.:.:.:.:.	./.:.:.:.:.	./.:.:.:.:.	./.:.:.:.:.	./.:.:.:.:.	./.:.:.:.:.	./.:.:.:.:.	./.:.:.:.:.	0/1:77,10:87:45:45,0,2152	4	Normal	HFD	RES	NO
S7	./.:.:.:.:.	./.:.:.:.:.	./.:.:.:.:.	./.:.:.:.:.	./.:.:.:.:.	./.:.:.:.:.	./.:.:.:.:.	./.:.:.:.:.	./.:.:.:.:.	./.:.:.:.:.	./.:.:.:.:.	./.:.:.:.:.	./.:.:.:.:.	./.:.:.:.:.	./.:.:.:.:.	0/1:64,8:72:32:32,0,1763	4	Tumour	NC	NO	NO
S8	./.:.:.:.:.	./.:.:.:.:.	./.:.:.:.:.	./.:.:.:.:.	./.:.:.:.:.	./.:.:.:.:.	./.:.:.:.:.	./.:.:.:.:.	./.:.:.:.:.	./.:.:.:.:.	./.:.:.:.:.	./.:.:.:.:.	./.:.:.:.:.	./.:.:.:.:.	./.:.:.:.:.	0/1:96,14:110:86:86,0,2614	4	Tumour	NC	NO	NO
S10	./.:.:.:.:.	./.:.:.:.:.	./.:.:.:.:.	./.:.:.:.:.	./.:.:.:.:.	./.:.:.:.:.	./.:.:.:.:.	./.:.:.:.:.	./.:.:.:.:.	./.:.:.:.:.	./.:.:.:.:.	./.:.:.:.:.	./.:.:.:.:.	./.:.:.:.:.	./.:.:.:.:.	0/1:97,20:117:99:200,0,2645	5	Tumour	NC	NO	NO
S11	./.:.:.:.:.	./.:.:.:.:.	./.:.:.:.:.	0/1:37,4:41:32:32,0,1206	./.:.:.:.:.	./.:.:.:.:.	./.:.:.:.:.	./.:.:.:.:.	./.:.:.:.:.	./.:.:.:.:.	./.:.:.:.:.	./.:.:.:.:.	./.:.:.:.:.	./.:.:.:.:.	./.:.:.:.:.	./.:.:.:.:.	5	Tumour	NC	NO	NO
S12	./.:.:.:.:.	./.:.:.:.:.	./.:.:.:.:.	./.:.:.:.:.	./.:.:.:.:.	./.:.:.:.:.	./.:.:.:.:.	./.:.:.:.:.	./.:.:.:.:.	./.:.:.:.:.	./.:.:.:.:.	./.:.:.:.:.	./.:.:.:.:.	./.:.:.:.:.	./.:.:.:.:.	./.:.:.:.:.	5	Normal	NC	NO	NO
S9	./.:.:.:.:.	./.:.:.:.:.	./.:.:.:.:.	./.:.:.:.:.	./.:.:.:.:.	./.:.:.:.:.	./.:.:.:.:.	./.:.:.:.:.	./.:.:.:.:.	./.:.:.:.:.	./.:.:.:.:.	./.:.:.:.:.	./.:.:.:.:.	./.:.:.:.:.	./.:.:.:.:.	0/1:96,16:112:99:161,0,2632	5	Tumour	NC	NO	NO
S13	./.:.:.:.:.	./.:.:.:.:.	./.:.:.:.:.	./.:.:.:.:.	./.:.:.:.:.	./.:.:.:.:.	./.:.:.:.:.	./.:.:.:.:.	./.:.:.:.:.	./.:.:.:.:.	./.:.:.:.:.	./.:.:.:.:.	./.:.:.:.:.	./.:.:.:.:.	./.:.:.:.:.	0/1:66,9:75:57:57,0,1763	6	Tumour	NC	NO	NO
S14	./.:.:.:.:.	./.:.:.:.:.	./.:.:.:.:.	./.:.:.:.:.	./.:.:.:.:.	./.:.:.:.:.	0/1:95,13:108:99:153,0,3109	./.:.:.:.:.	./.:.:.:.:.	./.:.:.:.:.	./.:.:.:.:.	0/1:81,16:97:99:268,0,2563	./.:.:.:.:.	./.:.:.:.:.	./.:.:.:.:.	0/1:82,15:97:99:175,0,2260	6	Tumour	NC	NO	NO
S15	./.:.:.:.:.	./.:.:.:.:.	./.:.:.:.:.	./.:.:.:.:.	./.:.:.:.:.	./.:.:.:.:.	./.:.:.:.:.	./.:.:.:.:.	./.:.:.:.:.	./.:.:.:.:.	./.:.:.:.:.	./.:.:.:.:.	./.:.:.:.:.	./.:.:.:.:.	./.:.:.:.:.	0/1:86,13:99:99:106,0,2370	6	Tumour	NC	NO	NO
S16	./.:.:.:.:.	./.:.:.:.:.	./.:.:.:.:.	./.:.:.:.:.	./.:.:.:.:.	./.:.:.:.:.	./.:.:.:.:.	./.:.:.:.:.	./.:.:.:.:.	./.:.:.:.:.	./.:.:.:.:.	./.:.:.:.:.	./.:.:.:.:.	./.:.:.:.:.	./.:.:.:.:.	0/1:62,8:70:38:38,0,1707	6	Tumour	NC	NO	NO
S40	./.:.:.:.:.	./.:.:.:.:.	./.:.:.:.:.	./.:.:.:.:.	0/1:65,17:82:99:331,0,1942	./.:.:.:.:.	./.:.:.:.:.	./.:.:.:.:.	./.:.:.:.:.	./.:.:.:.:.	./.:.:.:.:.	./.:.:.:.:.	./.:.:.:.:.	./.:.:.:.:.	./.:.:.:.:.	0/1:79,15:94:99:160,0,2160	6	Normal	HFD	RES	NO
S17	./.:.:.:.:.	./.:.:.:.:.	./.:.:.:.:.	./.:.:.:.:.	./.:.:.:.:.	./.:.:.:.:.	./.:.:.:.:.	./.:.:.:.:.	./.:.:.:.:.	0/1:67,68:135:99:2106,0,2046	./.:.:.:.:.	./.:.:.:.:.	./.:.:.:.:.	./.:.:.:.:.	./.:.:.:.:.	0/1:109,22:131:99:291,0,2988	7	Tumour	NC	NO	NO
S18	./.:.:.:.:.	./.:.:.:.:.	./.:.:.:.:.	./.:.:.:.:.	./.:.:.:.:.	./.:.:.:.:.	./.:.:.:.:.	./.:.:.:.:.	./.:.:.:.:.	./.:.:.:.:.	0/1:37,46:83:99:1329,0,1034	./.:.:.:.:.	./.:.:.:.:.	./.:.:.:.:.	./.:.:.:.:.	0/1:100,14:114:74:74,0,2725	7	Tumour	NC	NO	NO
S19	./.:.:.:.:.	./.:.:.:.:.	./.:.:.:.:.	./.:.:.:.:.	./.:.:.:.:.	./.:.:.:.:.	./.:.:.:.:.	./.:.:.:.:.	./.:.:.:.:.	./.:.:.:.:.	0/1:36,41:77:99:1223,0,1049	./.:.:.:.:.	./.:.:.:.:.	./.:.:.:.:.	./.:.:.:.:.	0/1:83,10:93:31:31,0,2293	7	Tumour	NC	NO	NO
S20	./.:.:.:.:.	./.:.:.:.:.	./.:.:.:.:.	./.:.:.:.:.	./.:.:.:.:.	./.:.:.:.:.	./.:.:.:.:.	./.:.:.:.:.	./.:.:.:.:.	0/1:39,111:150:99:3368,0,941	./.:.:.:.:.	./.:.:.:.:.	./.:.:.:.:.	./.:.:.:.:.	./.:.:.:.:.	0/1:124,18:142:99:113,0,3393	7	Normal_Tumour	NC	NO	NO
S21	./.:.:.:.:.	./.:.:.:.:.	./.:.:.:.:.	./.:.:.:.:.	./.:.:.:.:.	0/1:91,36:127:99:878,0,2853	./.:.:.:.:.	./.:.:.:.:.	./.:.:.:.:.	./.:.:.:.:.	./.:.:.:.:.	./.:.:.:.:.	./.:.:.:.:.	./.:.:.:.:.	./.:.:.:.:.	0/1:123,16:139:76:76,0,3354	8	Normal	HFD	NO	NO
S41	./.:.:.:.:.	./.:.:.:.:.	./.:.:.:.:.	./.:.:.:.:.	./.:.:.:.:.	./.:.:.:.:.	./.:.:.:.:.	./.:.:.:.:.	./.:.:.:.:.	./.:.:.:.:.	./.:.:.:.:.	./.:.:.:.:.	./.:.:.:.:.	./.:.:.:.:.	./.:.:.:.:.	0/1:53,10:63:99:121,0,1454	8	Normal	HFD	RES	NO
S42	./.:.:.:.:.	./.:.:.:.:.	./.:.:.:.:.	./.:.:.:.:.	./.:.:.:.:.	./.:.:.:.:.	./.:.:.:.:.	./.:.:.:.:.	./.:.:.:.:.	./.:.:.:.:.	./.:.:.:.:.	./.:.:.:.:.	./.:.:.:.:.	./.:.:.:.:.	./.:.:.:.:.	0/1:50,9:59:99:103,0,1367	9	Tumour	HFD	RES	NO
S43	./.:.:.:.:.	./.:.:.:.:.	./.:.:.:.:.	./.:.:.:.:.	./.:.:.:.:.	./.:.:.:.:.	./.:.:.:.:.	./.:.:.:.:.	./.:.:.:.:.	./.:.:.:.:.	./.:.:.:.:.	./.:.:.:.:.	./.:.:.:.:.	./.:.:.:.:.	./.:.:.:.:.	./.:.:.:.:.	9	Tumour	HFD	RES	NO
S44	./.:.:.:.:.	./.:.:.:.:.	./.:.:.:.:.	./.:.:.:.:.	./.:.:.:.:.	./.:.:.:.:.	./.:.:.:.:.	./.:.:.:.:.	0/1:80,47:127:99:1217,0,2309	./.:.:.:.:.	./.:.:.:.:.	./.:.:.:.:.	./.:.:.:.:.	./.:.:.:.:.	./.:.:.:.:.	0/1:77,10:87:29:29,0,2129	9	Normal	HFD	RES	NO
S22	./.:.:.:.:.	./.:.:.:.:.	./.:.:.:.:.	./.:.:.:.:.	./.:.:.:.:.	./.:.:.:.:.	./.:.:.:.:.	./.:.:.:.:.	./.:.:.:.:.	./.:.:.:.:.	./.:.:.:.:.	./.:.:.:.:.	./.:.:.:.:.	./.:.:.:.:.	./.:.:.:.:.	./.:.:.:.:.	10	Normal	HFD	NO	NO
S45	./.:.:.:.:.	./.:.:.:.:.	./.:.:.:.:.	./.:.:.:.:.	./.:.:.:.:.	./.:.:.:.:.	./.:.:.:.:.	./.:.:.:.:.	./.:.:.:.:.	./.:.:.:.:.	./.:.:.:.:.	./.:.:.:.:.	./.:.:.:.:.	./.:.:.:.:.	./.:.:.:.:.	0/1:55,11:66:99:144,0,1507	10	Normal	HFD	RES	NO
S23	./.:.:.:.:.	./.:.:.:.:.	./.:.:.:.:.	./.:.:.:.:.	./.:.:.:.:.	./.:.:.:.:.	./.:.:.:.:.	./.:.:.:.:.	./.:.:.:.:.	./.:.:.:.:.	./.:.:.:.:.	./.:.:.:.:.	./.:.:.:.:.	./.:.:.:.:.	./.:.:.:.:.	0/1:98,22:120:99:296,0,2672	11	Tumour	HFD	NO	NO
S24	./.:.:.:.:.	./.:.:.:.:.	0/1:114,45:159:99:1126,0,3470	./.:.:.:.:.	./.:.:.:.:.	./.:.:.:.:.	./.:.:.:.:.	./.:.:.:.:.	./.:.:.:.:.	./.:.:.:.:.	./.:.:.:.:.	./.:.:.:.:.	./.:.:.:.:.	./.:.:.:.:.	./.:.:.:.:.	./.:.:.:.:.	11	Tumour	HFD	NO	NO
S25	./.:.:.:.:.	./.:.:.:.:.	./.:.:.:.:.	./.:.:.:.:.	./.:.:.:.:.	./.:.:.:.:.	./.:.:.:.:.	./.:.:.:.:.	./.:.:.:.:.	./.:.:.:.:.	./.:.:.:.:.	./.:.:.:.:.	./.:.:.:.:.	./.:.:.:.:.	./.:.:.:.:.	0/1:100,19:119:99:209,0,2736	11	Tumour	HFD	NO	NO
S46	./.:.:.:.:.	./.:.:.:.:.	./.:.:.:.:.	./.:.:.:.:.	./.:.:.:.:.	./.:.:.:.:.	./.:.:.:.:.	./.:.:.:.:.	./.:.:.:.:.	./.:.:.:.:.	./.:.:.:.:.	./.:.:.:.:.	./.:.:.:.:.	./.:.:.:.:.	./.:.:.:.:.	0/1:60,8:68:44:44,0,1642	11	Normal	HFD	RES	NO
S26	./.:.:.:.:.	./.:.:.:.:.	./.:.:.:.:.	./.:.:.:.:.	./.:.:.:.:.	./.:.:.:.:.	./.:.:.:.:.	./.:.:.:.:.	./.:.:.:.:.	./.:.:.:.:.	./.:.:.:.:.	./.:.:.:.:.	./.:.:.:.:.	./.:.:.:.:.	0/1:124,29:153:99:544,0,3952	0/1:64,8:72:31:31,0,1759	12	Tumour	HFD	NO	NO
S27	./.:.:.:.:.	./.:.:.:.:.	./.:.:.:.:.	./.:.:.:.:.	./.:.:.:.:.	./.:.:.:.:.	./.:.:.:.:.	./.:.:.:.:.	./.:.:.:.:.	./.:.:.:.:.	./.:.:.:.:.	./.:.:.:.:.	./.:.:.:.:.	./.:.:.:.:.	0/1:119,45:164:99:1063,0,3732	0/1:58,8:66:50:50,0,1564	12	Tumour	HFD	NO	NO
S28	./.:.:.:.:.	./.:.:.:.:.	./.:.:.:.:.	./.:.:.:.:.	./.:.:.:.:.	./.:.:.:.:.	./.:.:.:.:.	./.:.:.:.:.	./.:.:.:.:.	./.:.:.:.:.	./.:.:.:.:.	./.:.:.:.:.	./.:.:.:.:.	./.:.:.:.:.	0/1:143,51:194:99:1188,0,4491	0/1:71,12:83:99:124,0,1944	12	Tumour	HFD	NO	NO
S29	./.:.:.:.:.	./.:.:.:.:.	./.:.:.:.:.	./.:.:.:.:.	./.:.:.:.:.	./.:.:.:.:.	./.:.:.:.:.	./.:.:.:.:.	./.:.:.:.:.	./.:.:.:.:.	./.:.:.:.:.	./.:.:.:.:.	./.:.:.:.:.	./.:.:.:.:.	0/1:161,42:203:99:861,0,5088	./.:.:.:.:.	12	Tumour	HFD	NO	NO
S47	./.:.:.:.:.	./.:.:.:.:.	./.:.:.:.:.	./.:.:.:.:.	./.:.:.:.:.	./.:.:.:.:.	./.:.:.:.:.	./.:.:.:.:.	./.:.:.:.:.	./.:.:.:.:.	./.:.:.:.:.	./.:.:.:.:.	./.:.:.:.:.	./.:.:.:.:.	./.:.:.:.:.	0/1:71,9:80:35:35,0,1963	12	Normal	HFD	RES	NO
S30	./.:.:.:.:.	./.:.:.:.:.	./.:.:.:.:.	./.:.:.:.:.	./.:.:.:.:.	./.:.:.:.:.	./.:.:.:.:.	./.:.:.:.:.	./.:.:.:.:.	./.:.:.:.:.	./.:.:.:.:.	./.:.:.:.:.	./.:.:.:.:.	./.:.:.:.:.	./.:.:.:.:.	0/1:92,13:105:68:68,0,2529	13	Normal	HFD	NO	NO
S48	./.:.:.:.:.	./.:.:.:.:.	./.:.:.:.:.	./.:.:.:.:.	./.:.:.:.:.	./.:.:.:.:.	./.:.:.:.:.	./.:.:.:.:.	./.:.:.:.:.	./.:.:.:.:.	./.:.:.:.:.	./.:.:.:.:.	./.:.:.:.:.	./.:.:.:.:.	./.:.:.:.:.	./.:.:.:.:.	13	Normal	HFD	NO	NO
S49	./.:.:.:.:.	./.:.:.:.:.	./.:.:.:.:.	./.:.:.:.:.	./.:.:.:.:.	./.:.:.:.:.	./.:.:.:.:.	./.:.:.:.:.	./.:.:.:.:.	./.:.:.:.:.	./.:.:.:.:.	./.:.:.:.:.	./.:.:.:.:.	./.:.:.:.:.	./.:.:.:.:.	./.:.:.:.:.	14	Normal	HFD	RES	NO
S57	./.:.:.:.:.	./.:.:.:.:.	./.:.:.:.:.	./.:.:.:.:.	./.:.:.:.:.	./.:.:.:.:.	./.:.:.:.:.	./.:.:.:.:.	./.:.:.:.:.	./.:.:.:.:.	./.:.:.:.:.	./.:.:.:.:.	./.:.:.:.:.	./.:.:.:.:.	./.:.:.:.:.	./.:.:.:.:.	14	Normal	HFD	NO	LIR
S50	./.:.:.:.:.	./.:.:.:.:.	./.:.:.:.:.	./.:.:.:.:.	./.:.:.:.:.	./.:.:.:.:.	./.:.:.:.:.	./.:.:.:.:.	./.:.:.:.:.	./.:.:.:.:.	./.:.:.:.:.	./.:.:.:.:.	./.:.:.:.:.	./.:.:.:.:.	./.:.:.:.:.	0/1:55,10:65:86:86,0,1515	15	Normal	HFD	NO	NO
S51	./.:.:.:.:.	./.:.:.:.:.	./.:.:.:.:.	./.:.:.:.:.	./.:.:.:.:.	./.:.:.:.:.	./.:.:.:.:.	./.:.:.:.:.	./.:.:.:.:.	./.:.:.:.:.	./.:.:.:.:.	./.:.:.:.:.	./.:.:.:.:.	./.:.:.:.:.	./.:.:.:.:.	0/1:84,12:96:61:61,0,2318	16	Normal	HFD	NO	NO
S58	./.:.:.:.:.	./.:.:.:.:.	./.:.:.:.:.	./.:.:.:.:.	./.:.:.:.:.	./.:.:.:.:.	./.:.:.:.:.	./.:.:.:.:.	./.:.:.:.:.	./.:.:.:.:.	./.:.:.:.:.	./.:.:.:.:.	./.:.:.:.:.	./.:.:.:.:.	./.:.:.:.:.	0/1:59,8:67:47:47,0,1634	16	Normal	HFD	NO	LIR
S52	./.:.:.:.:.	./.:.:.:.:.	./.:.:.:.:.	./.:.:.:.:.	./.:.:.:.:.	./.:.:.:.:.	./.:.:.:.:.	./.:.:.:.:.	./.:.:.:.:.	./.:.:.:.:.	./.:.:.:.:.	./.:.:.:.:.	./.:.:.:.:.	./.:.:.:.:.	./.:.:.:.:.	./.:.:.:.:.	17	Normal	HFD	NO	NO
S59	./.:.:.:.:.	./.:.:.:.:.	./.:.:.:.:.	./.:.:.:.:.	./.:.:.:.:.	./.:.:.:.:.	./.:.:.:.:.	./.:.:.:.:.	./.:.:.:.:.	./.:.:.:.:.	./.:.:.:.:.	./.:.:.:.:.	./.:.:.:.:.	./.:.:.:.:.	./.:.:.:.:.	./.:.:.:.:.	17	Normal	HFD	NO	LIR
S53	./.:.:.:.:.	./.:.:.:.:.	./.:.:.:.:.	./.:.:.:.:.	./.:.:.:.:.	./.:.:.:.:.	./.:.:.:.:.	./.:.:.:.:.	./.:.:.:.:.	./.:.:.:.:.	./.:.:.:.:.	./.:.:.:.:.	./.:.:.:.:.	./.:.:.:.:.	./.:.:.:.:.	./.:.:.:.:.	18	Normal	HFD	NO	LIR
S54	./.:.:.:.:.	./.:.:.:.:.	./.:.:.:.:.	./.:.:.:.:.	./.:.:.:.:.	./.:.:.:.:.	./.:.:.:.:.	./.:.:.:.:.	./.:.:.:.:.	./.:.:.:.:.	./.:.:.:.:.	./.:.:.:.:.	./.:.:.:.:.	./.:.:.:.:.	./.:.:.:.:.	./.:.:.:.:.	19	Normal	HFD	NO	LIR
S60	./.:.:.:.:.	./.:.:.:.:.	./.:.:.:.:.	./.:.:.:.:.	./.:.:.:.:.	./.:.:.:.:.	./.:.:.:.:.	./.:.:.:.:.	./.:.:.:.:.	./.:.:.:.:.	./.:.:.:.:.	./.:.:.:.:.	0/1:99,31:130:99:637,0,2844	./.:.:.:.:.	./.:.:.:.:.	./.:.:.:.:.	19	Tumour	HFD	NO	LIR
S61	./.:.:.:.:.	./.:.:.:.:.	./.:.:.:.:.	./.:.:.:.:.	./.:.:.:.:.	./.:.:.:.:.	./.:.:.:.:.	./.:.:.:.:.	./.:.:.:.:.	./.:.:.:.:.	./.:.:.:.:.	./.:.:.:.:.	./.:.:.:.:.	./.:.:.:.:.	./.:.:.:.:.	./.:.:.:.:.	19	Tumour	HFD	NO	LIR
S62	./.:.:.:.:.	./.:.:.:.:.	./.:.:.:.:.	./.:.:.:.:.	./.:.:.:.:.	./.:.:.:.:.	./.:.:.:.:.	./.:.:.:.:.	./.:.:.:.:.	./.:.:.:.:.	./.:.:.:.:.	./.:.:.:.:.	./.:.:.:.:.	./.:.:.:.:.	./.:.:.:.:.	./.:.:.:.:.	19	Normal	HFD	NO	LIR
S63	./.:.:.:.:.	./.:.:.:.:.	./.:.:.:.:.	./.:.:.:.:.	./.:.:.:.:.	./.:.:.:.:.	./.:.:.:.:.	./.:.:.:.:.	./.:.:.:.:.	./.:.:.:.:.	./.:.:.:.:.	./.:.:.:.:.	./.:.:.:.:.	./.:.:.:.:.	./.:.:.:.:.	./.:.:.:.:.	19	Normal	HFD	NO	LIR
S55	./.:.:.:.:.	./.:.:.:.:.	./.:.:.:.:.	./.:.:.:.:.	./.:.:.:.:.	./.:.:.:.:.	./.:.:.:.:.	./.:.:.:.:.	./.:.:.:.:.	./.:.:.:.:.	./.:.:.:.:.	./.:.:.:.:.	./.:.:.:.:.	./.:.:.:.:.	./.:.:.:.:.	./.:.:.:.:.	20	Normal	HFD	NO	LIR
S64	./.:.:.:.:.	./.:.:.:.:.	./.:.:.:.:.	./.:.:.:.:.	./.:.:.:.:.	./.:.:.:.:.	./.:.:.:.:.	./.:.:.:.:.	./.:.:.:.:.	./.:.:.:.:.	./.:.:.:.:.	./.:.:.:.:.	./.:.:.:.:.	./.:.:.:.:.	./.:.:.:.:.	./.:.:.:.:.	20	Normal	HFD	NO	LIR
S31	./.:.:.:.:.	./.:.:.:.:.	./.:.:.:.:.	./.:.:.:.:.	./.:.:.:.:.	./.:.:.:.:.	./.:.:.:.:.	./.:.:.:.:.	./.:.:.:.:.	./.:.:.:.:.	./.:.:.:.:.	./.:.:.:.:.	./.:.:.:.:.	./.:.:.:.:.	./.:.:.:.:.	./.:.:.:.:.	21	Tumour	HFD	NO	NO
S56	./.:.:.:.:.	./.:.:.:.:.	./.:.:.:.:.	./.:.:.:.:.	./.:.:.:.:.	./.:.:.:.:.	./.:.:.:.:.	./.:.:.:.:.	./.:.:.:.:.	./.:.:.:.:.	./.:.:.:.:.	./.:.:.:.:.	./.:.:.:.:.	./.:.:.:.:.	./.:.:.:.:.	./.:.:.:.:.	21	Normal	HFD	NO	LIR
S32	./.:.:.:.:.	./.:.:.:.:.	./.:.:.:.:.	./.:.:.:.:.	./.:.:.:.:.	./.:.:.:.:.	./.:.:.:.:.	./.:.:.:.:.	./.:.:.:.:.	./.:.:.:.:.	./.:.:.:.:.	./.:.:.:.:.	./.:.:.:.:.	./.:.:.:.:.	./.:.:.:.:.	0/1:95,12:107:52:52,0,2621	22	Tumour	HFD	NO	NO
S33	./.:.:.:.:.	./.:.:.:.:.	./.:.:.:.:.	./.:.:.:.:.	./.:.:.:.:.	./.:.:.:.:.	./.:.:.:.:.	./.:.:.:.:.	./.:.:.:.:.	./.:.:.:.:.	./.:.:.:.:.	./.:.:.:.:.	./.:.:.:.:.	./.:.:.:.:.	./.:.:.:.:.	0/1:83,15:98:99:172,0,2271	22	Tumour	HFD	NO	NO
S34	./.:.:.:.:.	./.:.:.:.:.	./.:.:.:.:.	./.:.:.:.:.	./.:.:.:.:.	./.:.:.:.:.	./.:.:.:.:.	./.:.:.:.:.	./.:.:.:.:.	./.:.:.:.:.	./.:.:.:.:.	./.:.:.:.:.	./.:.:.:.:.	./.:.:.:.:.	./.:.:.:.:.	0/1:96,20:116:99:273,0,2619	22	Tumour	HFD	NO	NO
S35	./.:.:.:.:.	./.:.:.:.:.	./.:.:.:.:.	./.:.:.:.:.	./.:.:.:.:.	./.:.:.:.:.	./.:.:.:.:.	./.:.:.:.:.	./.:.:.:.:.	./.:.:.:.:.	./.:.:.:.:.	./.:.:.:.:.	./.:.:.:.:.	./.:.:.:.:.	./.:.:.:.:.	0/1:88,12:100:72:72,0,2425	22	Normal_Tumour	HFD	NO	NO
S65	./.:.:.:.:.	./.:.:.:.:.	./.:.:.:.:.	./.:.:.:.:.	./.:.:.:.:.	./.:.:.:.:.	./.:.:.:.:.	./.:.:.:.:.	./.:.:.:.:.	./.:.:.:.:.	./.:.:.:.:.	./.:.:.:.:.	./.:.:.:.:.	./.:.:.:.:.	./.:.:.:.:.	./.:.:.:.:.	23	Normal	HFD	NO	LIR
S66	./.:.:.:.:.	./.:.:.:.:.	./.:.:.:.:.	./.:.:.:.:.	./.:.:.:.:.	./.:.:.:.:.	./.:.:.:.:.	./.:.:.:.:.	./.:.:.:.:.	./.:.:.:.:.	./.:.:.:.:.	./.:.:.:.:.	./.:.:.:.:.	./.:.:.:.:.	./.:.:.:.:.	./.:.:.:.:.	24	Tumour	HFD	NO	LIR
S67	./.:.:.:.:.	./.:.:.:.:.	./.:.:.:.:.	./.:.:.:.:.	./.:.:.:.:.	./.:.:.:.:.	./.:.:.:.:.	./.:.:.:.:.	./.:.:.:.:.	./.:.:.:.:.	./.:.:.:.:.	./.:.:.:.:.	./.:.:.:.:.	0/1:196,24:220:99:123,0,5425	./.:.:.:.:.	./.:.:.:.:.	24	Normal	HFD	NO	LIR

## Sheet: Supplementary Table S4
Rat – human TP53 variant orthologs
RAT_CDS	RAT_AA	HUMAN_CDS	HUMAN_AA	Endometrium_variant_n_COSMIC
c.518G>A	p.Arg173His	c.524G>A	p.Arg175His	31
c.526C>G	p.His176Asp	c.532C>G	p.His178Asp	3
c.532G>A	p.Glu178Lys	-	-	-
c.574C>T	p.Leu192Phe	-	-	-
c.631C>T	p.Arg211Trp	c.637C>T	p.R213*	28
c.728G>C	p.Gly243Ala	c.734G>C	p.G245A	1
c.736C>T	p.Arg246Cys	c.743C>T	p.R248W	30
c.737G>A	p.Arg246His	c.743G>A	p.R248Q	44
c.739C>T	p.Arg247Trp	-	-	-
c.740G>A	p.Arg247Gln	-	-	-
c.791G>A	p.Gly264Glu	c.796G>A	p.G266R	3
c.796G>T	p.Asp266Tyr	-	-	-
c.833G>C	p.Arg278Thr	c.839G>C	p.R280I	1
c.851A>G	p.Glu284Gly	-	-	-
c.860del	p.Phe287SerfsTer56	-	-	-

## Sheet: Supplementary Table S5
MSI status, TMB and metadata
sample	MSI_	Individual	Tissue	Diet	Intervention	total_	TMB
	status					variants
S1	0	1	Normal	NC	NO	8699	10.2
S10	1	5	Tumour	NC	NO	8082	9.5
S11	1	5	Tumour	NC	NO	8175	9.6
S13	0	6	Tumour	NC	NO	8508	10
S14	1	6	Tumour	NC	NO	8819	10.3
S15	1	6	Tumour	NC	NO	8700	10.2
S16	0	6	Tumour	NC	NO	9456	11.1
S17	1	7	Tumour	NC	NO	8983	10.5
S18	1	7	Tumour	NC	NO	8321	9.7
S19	1	7	Tumour	NC	NO	8161	9.6
S20	0	7	Normal	NC	NO	8311	9.7
S21	1	8	Normal	HFD	NO	8497	9.9
S22	1	10	Normal	HFD	NO	8233	9.6
S23	1	11	Tumour	HFD	NO	8312	9.7
S24	1	11	Tumour	HFD	NO	8156	9.5
S25	1	11	Tumour	HFD	NO	8185	9.6
S26	1	12	Tumour	HFD	NO	8675	10.2
S27	1	12	Tumour	HFD	NO	8864	10.4
S28	1	12	Tumour	HFD	NO	8389	9.8
S29	1	12	Tumour	HFD	NO	8137	9.5
S3	0	1	Tumour	NC	NO	8002	9.4
S30	1	13	Normal	HFD	NO	8626	10.1
S31	1	21	Tumour	HFD	NO	8216	9.6
S32	1	22	Tumour	HFD	NO	8496	9.9
S33	0	22	Tumour	HFD	NO	8460	9.9
S34	1	22	Tumour	HFD	NO	8633	10.1
S35	0	22	Normal	HFD	NO	8565	10
S36	1	2	Tumour	HFD	RES	8895	10.4
S37	1	2	Normal	HFD	RES	8937	10.5
S38	1	3	Normal	HFD	RES	9416	11
S39	1	4	Normal	HFD	RES	11176	13.1
S4	0	1	Tumour	NC	NO	8034	9.4
S40	1	6	Normal	HFD	RES	9200	10.8
S41	1	8	Normal	HFD	RES	12235	14.3
S42	0	9	Tumour	HFD	RES	10014	11.7
S43	0	9	Tumour	HFD	RES	9749	11.4
S44	0	9	Normal	HFD	RES	9811	11.5
S45	1	10	Normal	HFD	RES	12047	14.1
S46	1	11	Normal	HFD	RES	10054	11.8
S47	1	12	Normal	HFD	RES	10001	11.7
S48	1	13	Normal	HFD	NO	8959	10.5
S49	0	14	Normal	HFD	RES	10940	12.8
S5	0	2	Normal	NC	NO	9345	10.9
S50	1	15	Normal	HFD	NO	9108	10.7
S51	1	16	Normal	HFD	NO	8792	10.3
S52	1	17	Normal	HFD	NO	9412	11
S53	1	18	Normal	HFD	LIR	10448	12.2
S54	1	19	Normal	HFD	LIR	10735	12.6
S55	1	20	Normal	HFD	LIR	9921	11.6
S56	1	21	Normal	HFD	LIR	10734	12.6
S57	1	14	Normal	HFD	LIR	9222	10.8
S58	1	16	Normal	HFD	LIR	10071	11.8
S59	1	17	Normal	HFD	LIR	9534	11.2
S6	0	3	Normal	NC	NO	8899	10.4
S60	1	19	Tumour	HFD	LIR	9317	10.9
S61	1	19	Tumour	HFD	LIR	9600	11.2
S62	1	19	Normal	HFD	LIR	8574	10
S63	1	19	Normal	HFD	LIR	9131	10.7
S64	1	20	Normal	HFD	LIR	8551	10
S65	1	23	Normal	HFD	LIR	9142	10.7
S66	1	24	Tumour	HFD	LIR	8462	9.9
S67	1	24	Normal	HFD	LIR	9203	10.8
S7	1	4	Tumour	NC	NO	8770	10.3
S8	1	4	Tumour	NC	NO	8583	10
S9	1	5	Tumour	NC	NO	8098	9.5
